# Supplementary material for: Molecular Docking, Computational and Antithrombotic Studies of Novel 1,3,4-oxadiazole Derivatives
Source: Preprints.org preprint supplement (doi:10.20944/preprints201808.0463.v1), 2018-08-27
Supplement: Supplementary file 1 [file supplementary]

## SUPPORTING INFORMATION

MajdaBatoool<sup>a</sup>, AffifaTajammal<sup>a</sup>, FarhatFirdous<sup>a</sup>, Francis Verpoort<sup>c</sup>, Zafar A. K. Khattak<sup>c</sup>, Mehr-un-Nisa<sup>d</sup>, Hafiz Adnan Ahmed<sup>e</sup>, Munawar Ali Munawar<sup>a</sup>, Muhammad Asim R. Basra<sup>a</sup>, Muhammad Zia ur. Rahman<sup>b</sup>

<sup>a</sup>Institute of Chemistry, University of the Punjab, New Campous , Lahore , 54600, Pakistan.

<sup>b</sup>Applied Chemistry Research Centre, PCSIR Labs Complex Ferozpur Road, Lahore 54600, Pakistan.

<sup>c</sup>Centre for Chemical and Mechanical Engineering, Wuhan University of Technology, Wuhan 430070, China.

<sup>d</sup>Division of Science & Technology, University of Education, Township Lahore, 54600, Pakistan.

<sup>e</sup>Laboratory of Organometallics, Catalysis and Ordered Materials,,Key Laboratory of Synthetic and Nature Molecule Chemistry of Ministry of Education, Department of Chemistry & Materials Science, Northwest University, Xi'an 710127, P. R. China.

### Corresponding author

Dr. Muhammad AsimRaza Basra.

Institute of Chemistry, University of the Punjab, New Campous , Lahore-54000 , Pakistan

asimarbasra@gmail.com.

# TABLE OF CONTENTS

| Figures |                                             | Page No. |
|---------|---------------------------------------------|----------|
| S1      | <sup>1</sup> H-NMR spectrum of compound 3a  | 4        |
| S2      | <sup>13</sup> C-NMR spectrum of compound 3a | 5        |
| S3      | EI-MS of compound 3a                        | 6        |
| S4      | <sup>1</sup> H-NMR spectrum of compound 3b  | 7        |
| S5      | <sup>13</sup> C-NMR spectrum of compound 3b | 8        |
| S6      | EI-MS of compound 3b                        | 9        |
| S7      | <sup>1</sup> H-NMR spectrum of compound 3c  | 10       |
| S8      | <sup>13</sup> C-NMR spectrum of compound 3c | 11       |
| S9      | EI-MS of compound 3c                        | 12       |
| S10     | <sup>1</sup> H-NMR spectrum of compound 3d  | 13       |
| S11     | <sup>13</sup> C-NMR spectrum of compound 3d | 14       |
| S12     | EI-MS of compound 3d                        | 15       |
| S13     | <sup>1</sup> H-NMR spectrum of compound 3e  | 16       |
| S14     | <sup>13</sup> C-NMR spectrum of compound 3e | 17       |
| S15     | EI-MS of compound 3e                        | 18       |
| S16     | <sup>1</sup> H-NMR spectrum of compound 3f  | 19       |
| S17     | <sup>13</sup> C-NMR spectrum of compound 3f | 20       |

|            |                                             |    |
|------------|---------------------------------------------|----|
| <b>S18</b> | EI-MS of compound 3f                        | 21 |
| <b>S19</b> | <sup>1</sup> H-NMR spectrum of compound 3g  | 22 |
| <b>S20</b> | <sup>13</sup> C-NMR spectrum of compound 3g | 23 |
| <b>S21</b> | EI-MS of compound 3g                        | 24 |
| <b>S22</b> | <sup>1</sup> H-NMR spectrum of compound 3h  | 25 |
| <b>S23</b> | <sup>13</sup> C-NMR spectrum of compound 3h | 26 |
| <b>S24</b> | EI-MS of compound 3h                        | 27 |
| <b>S25</b> | <sup>1</sup> H-NMR spectrum of compound 3i  | 28 |
| <b>S26</b> | <sup>13</sup> C-NMR spectrum of compound 3i | 29 |
| <b>S27</b> | EI-MS of compound 3i                        | 3  |

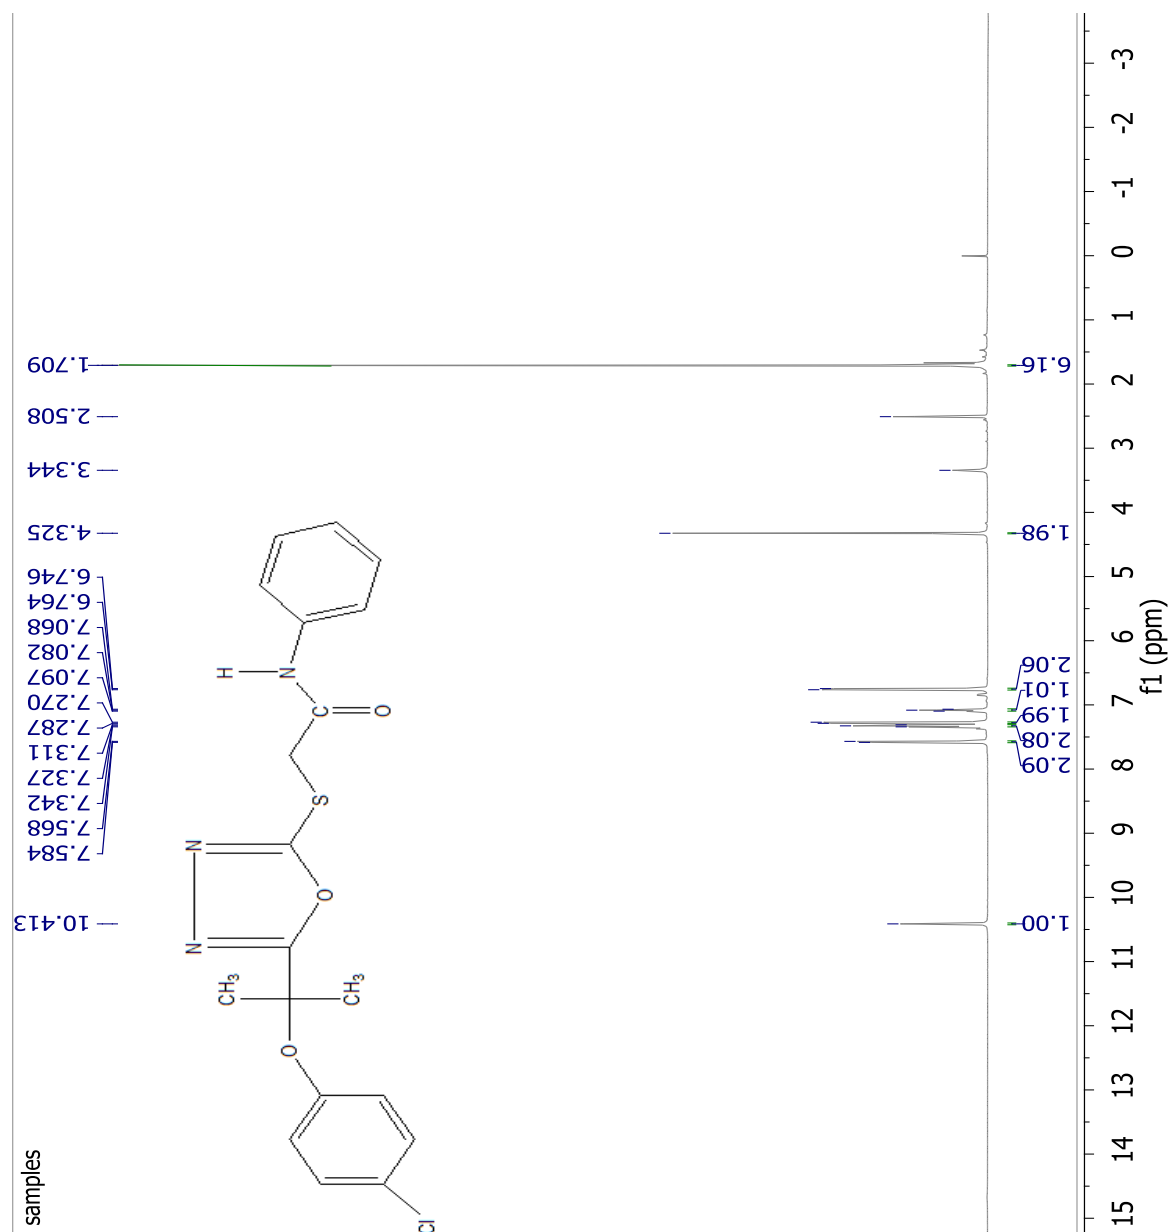

Figure-S1: <sup>1</sup>H-NMR spectrum of compound 3a

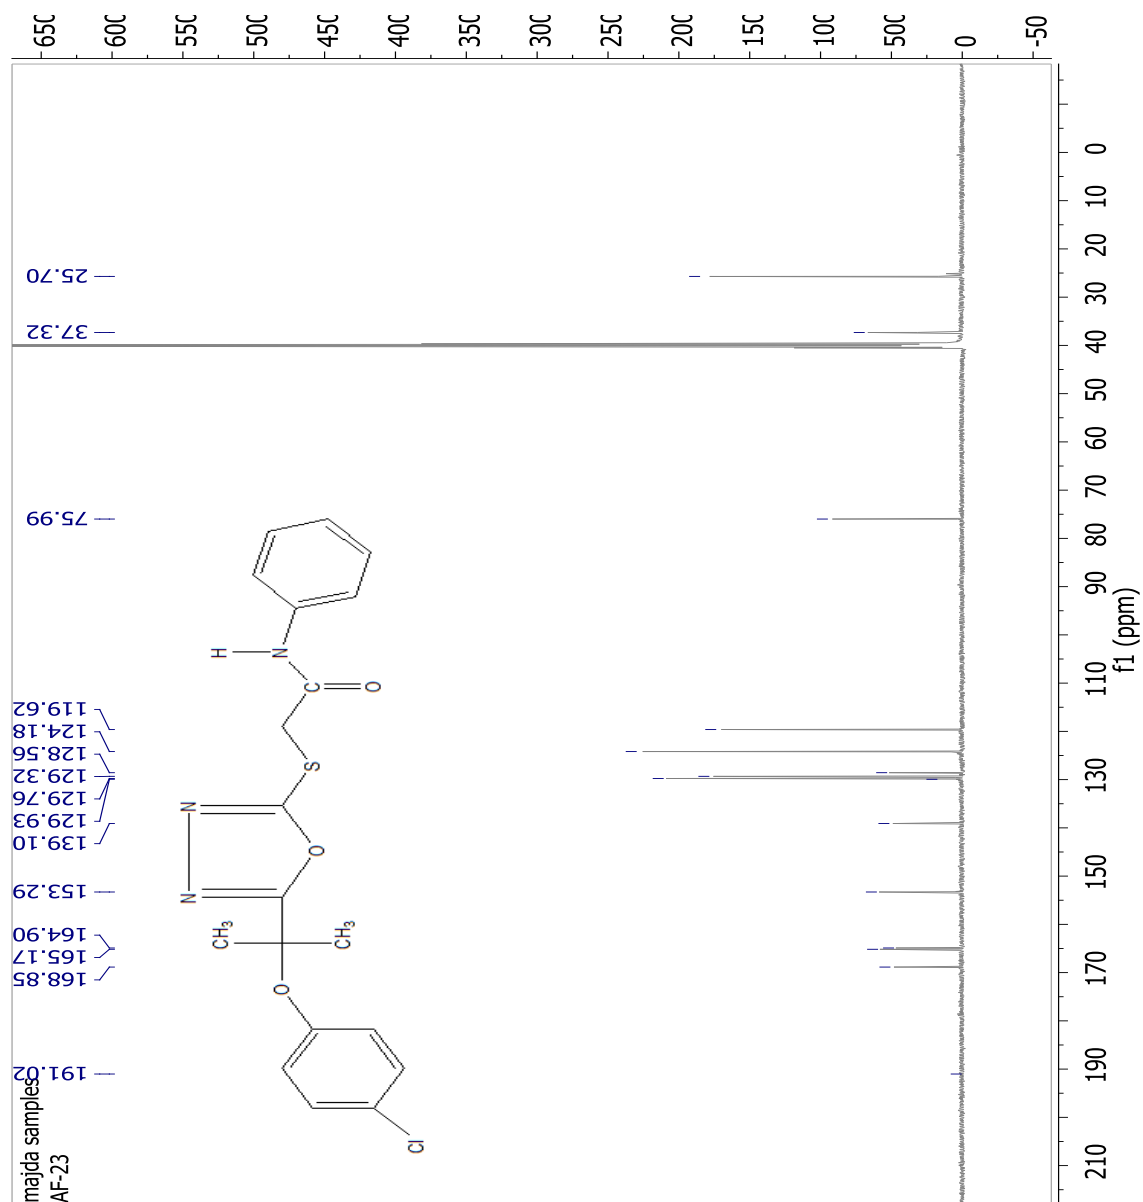

Figure-S2: <sup>13</sup>C-NMR spectrum of compound 3a

Mass Lab (104)  
6/19/2017 1:14:38 PM

File: 28P  
Date Run: 06-19-2017 (Time Run: 13:10:55)  
Sample: MMAJDA BATOOL/INST. OF CHEM /UNL OF PUNJAB LAHORE  
Instrument: JEOL 600 MSRoute  
Inlet: Direct Probe  
Ionization mode: EI+

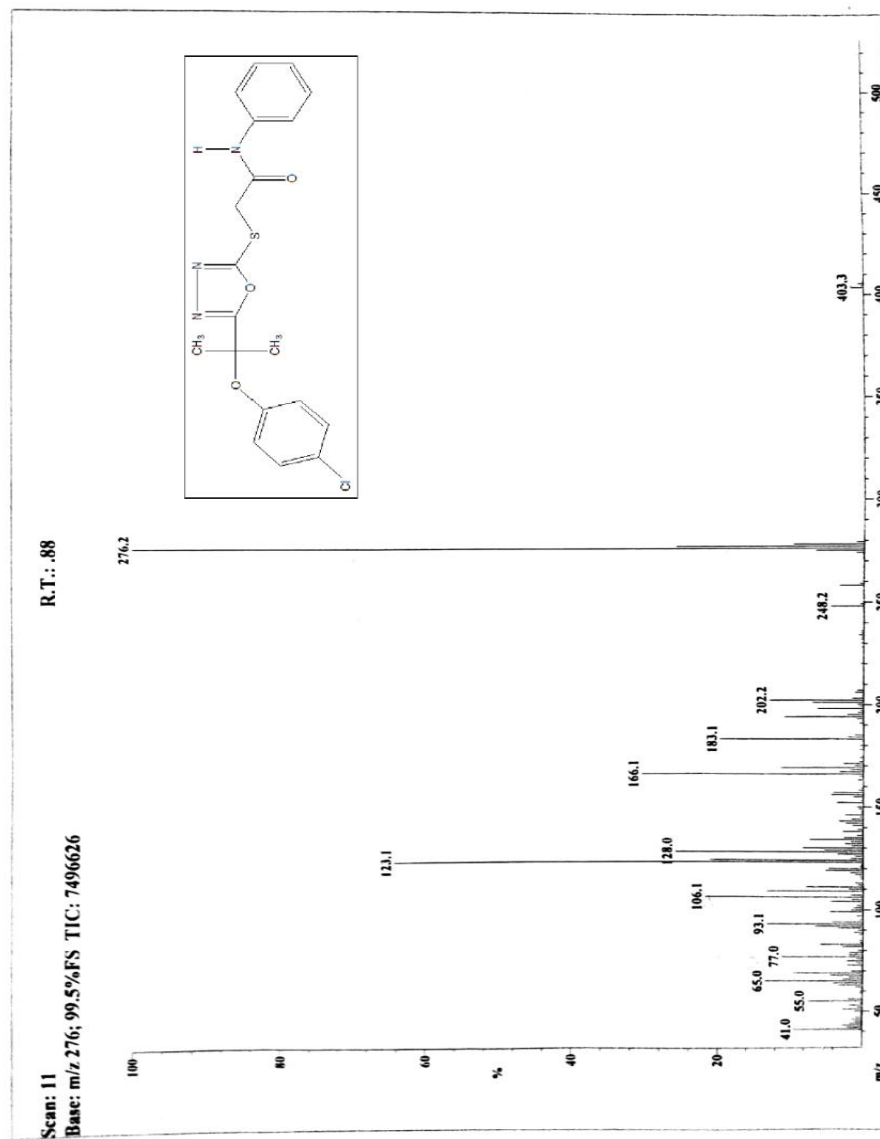

Figure-S3: EI-MS of compound 3a

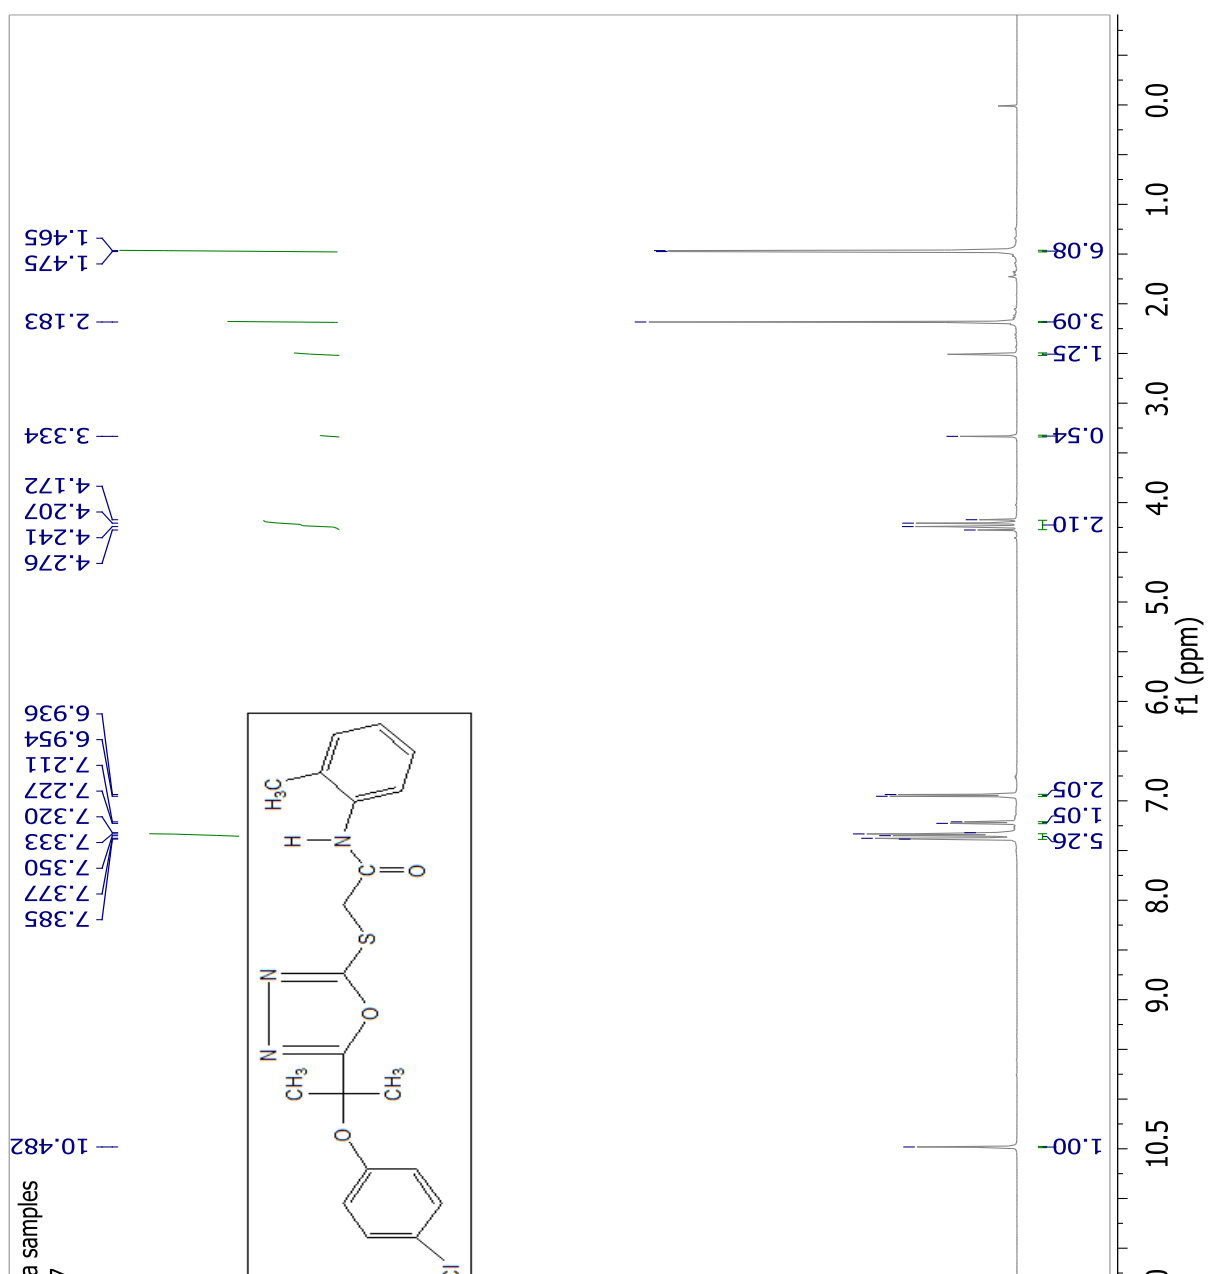

Figure-S4:  $^1\text{H}$ -NMR spectrum of compound 3b

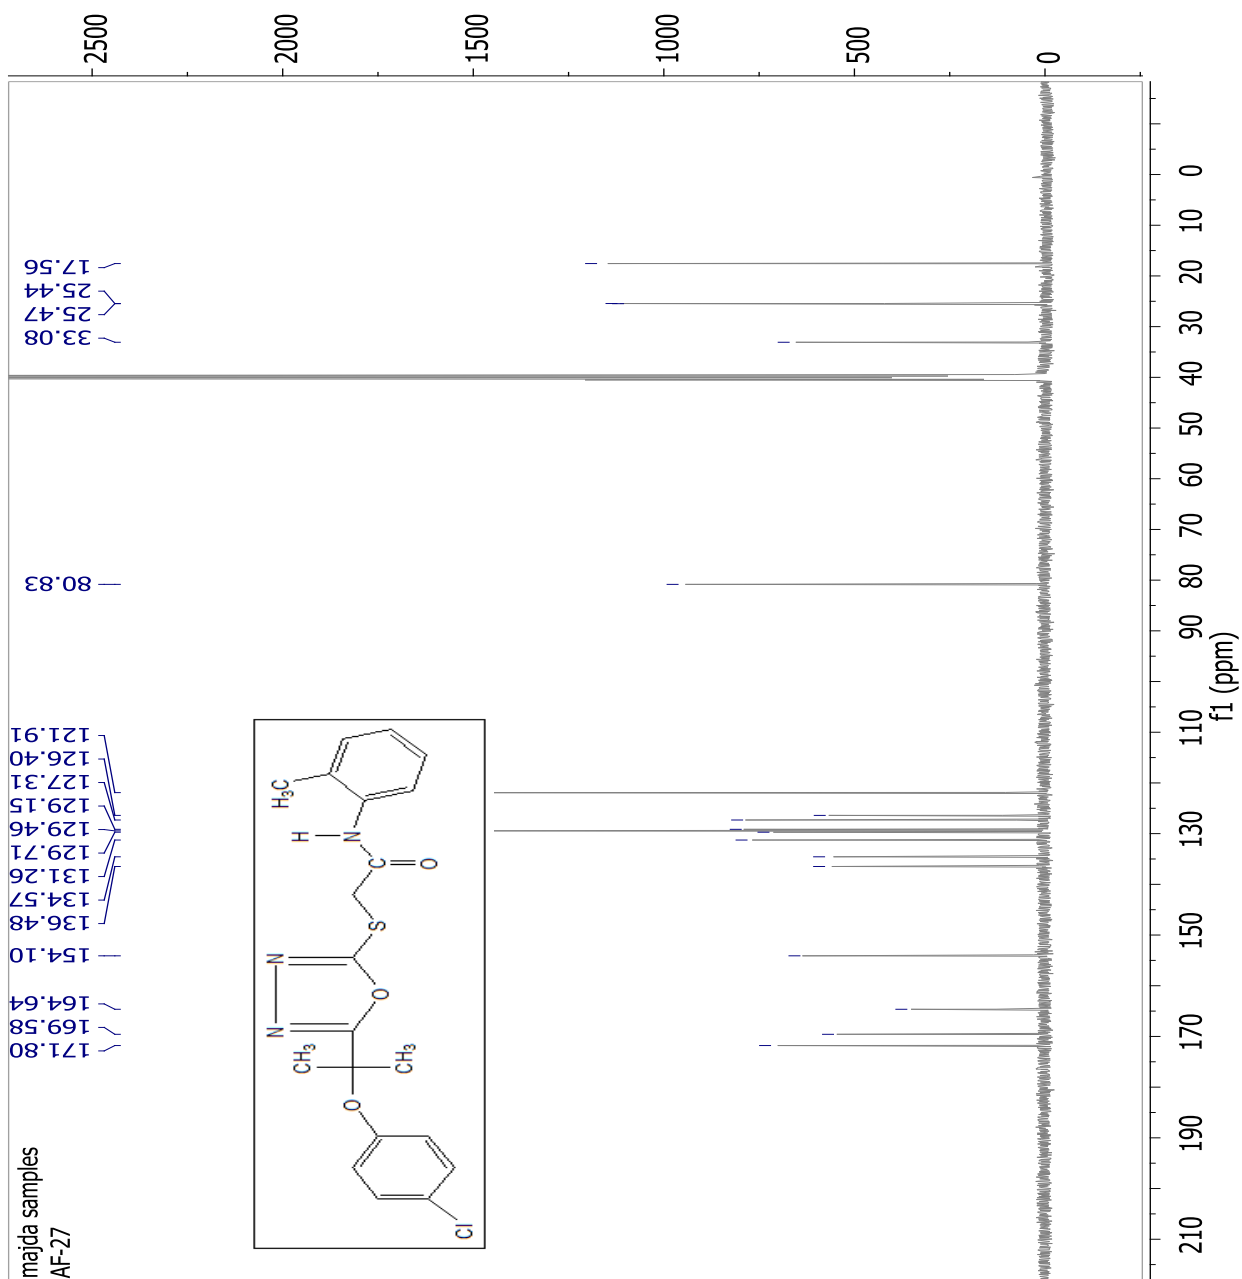

Figure-S5:  $^{13}\text{C}$ -NMR spectrum of compound 3b



Mass Lab (104)  
6/20/2017 10:19:52 AM

File: 41P  
Date Run: 06-20-2017 (Time Run: 10:11:39)  
Sample: MAJDA BATOOL/INST. OF CHEM /UNLOF PUNJAB LAHORE  
Instrument: JEOL 600 MSRoute  
Inlet: Direct Probe  
Ionization mode: EI+

n: 8  
e: m/z 290; 99.5%FS TIC: 8911554

R.T.: .62

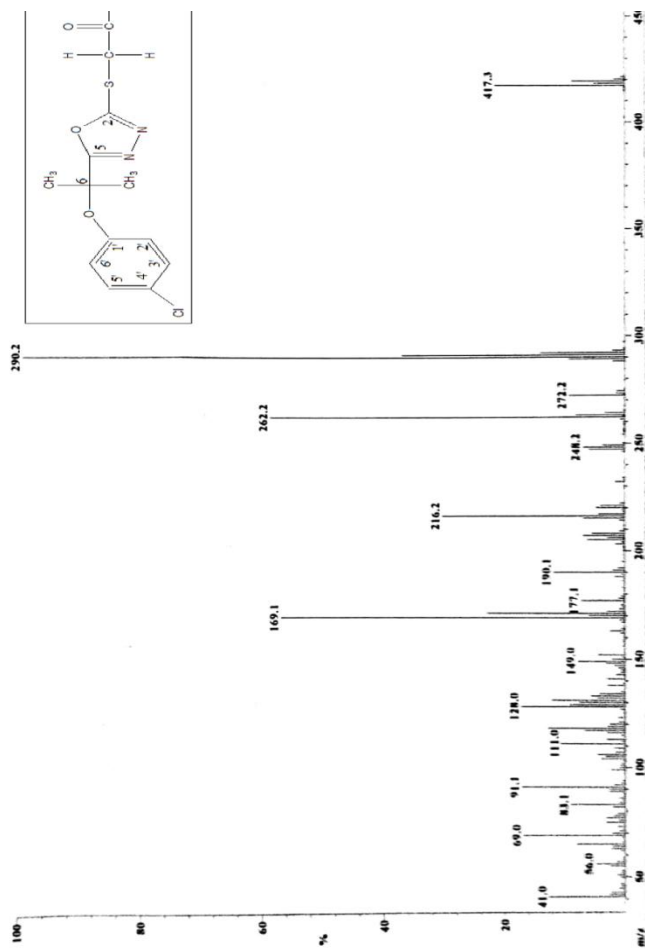

Figure-S6-: EI-MS of compound 3b

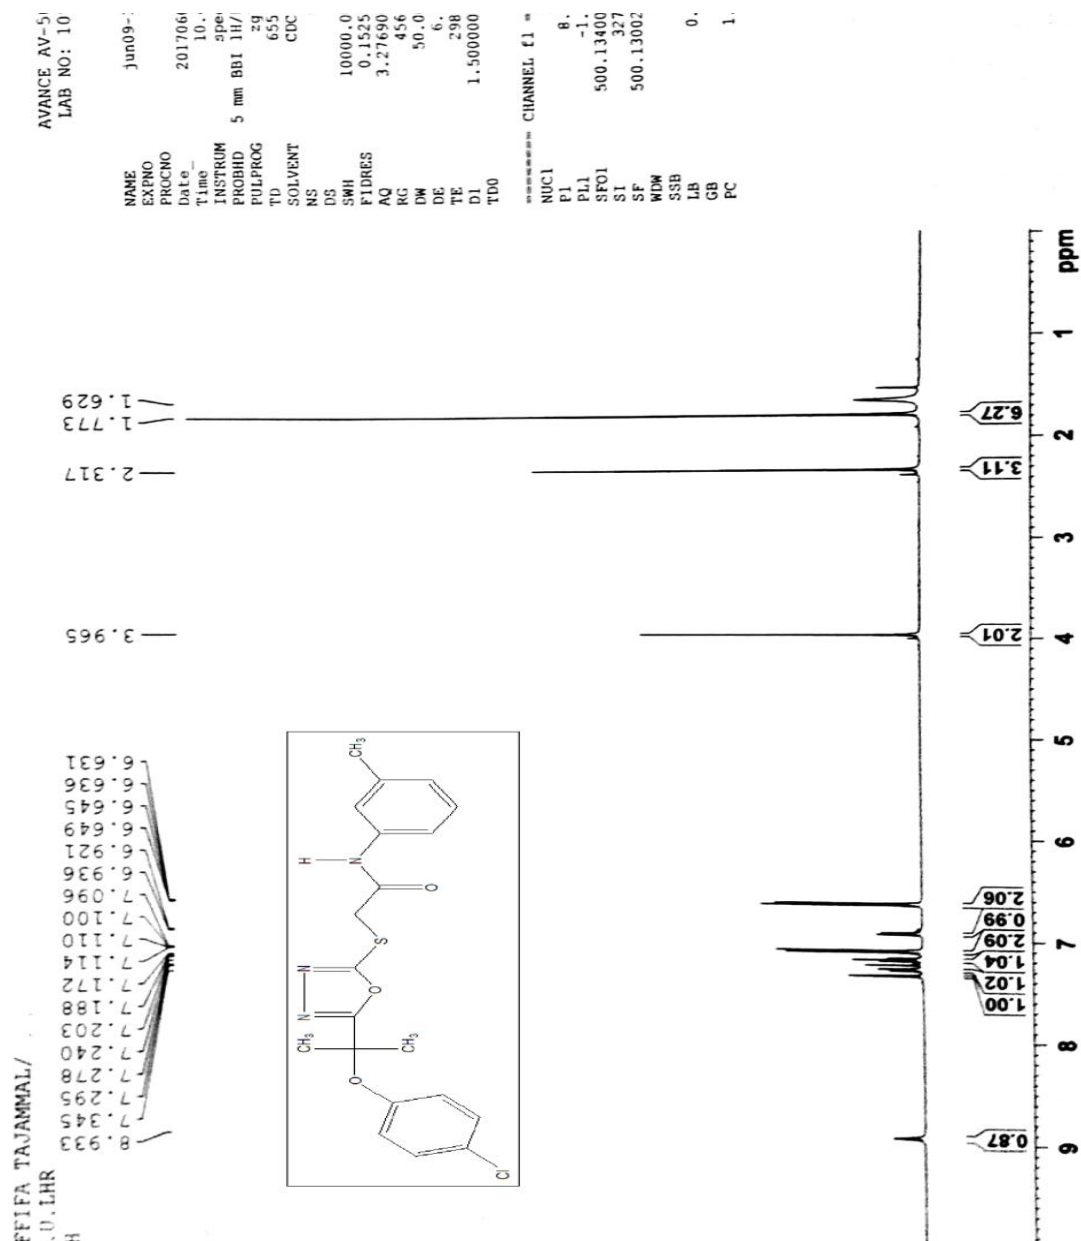

Figure-S7:  $^1\text{H}$ -NMR spectrum of compound 3c

AFFIFA /42P/CH:DEPT:U.O.PUNJAB/BB/

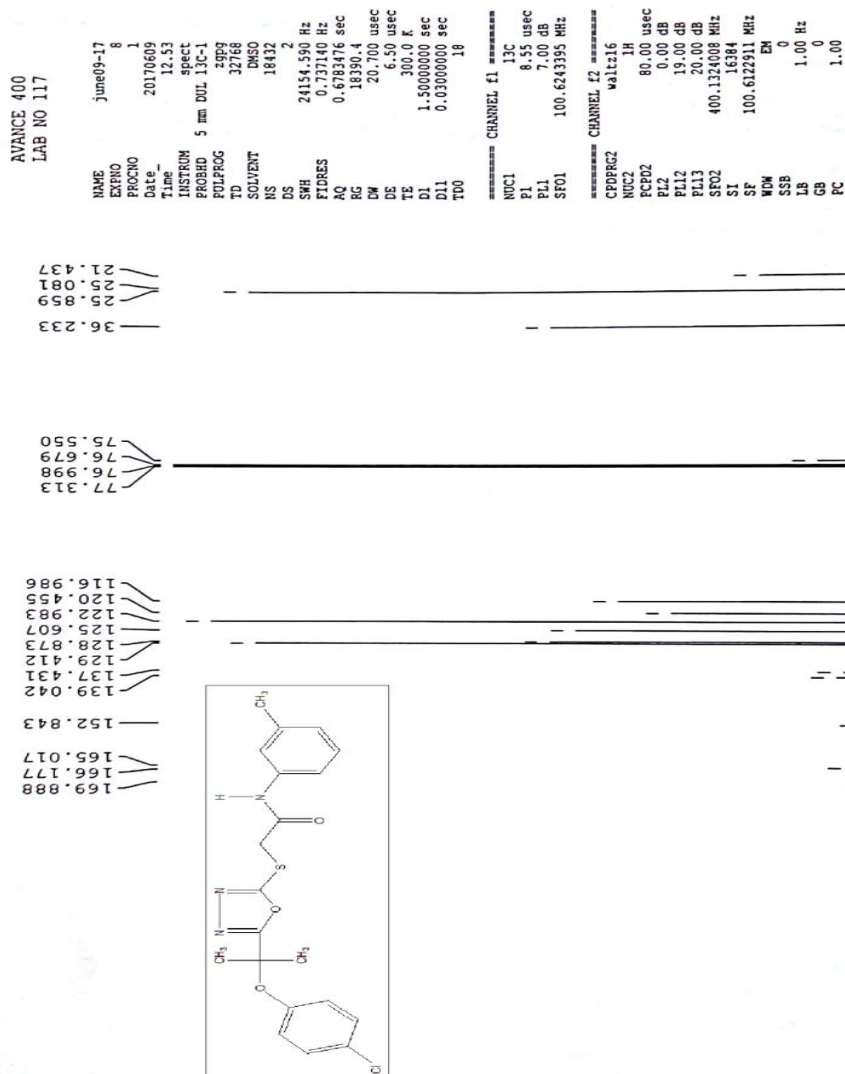

Figure-S8: <sup>13</sup> C-NMR spectrum of compound 3c

File: 42P Date Run: 06-20-2017 (Time Run: 08:53:33)  
Sample: MALDA BATOOL/INST. OF CHEM/UNIOF PUNJAB LAHORE  
Instrument: JEOL 600 MSRoute  
Inlet: Direct Probe  
Ionization mode: ESI

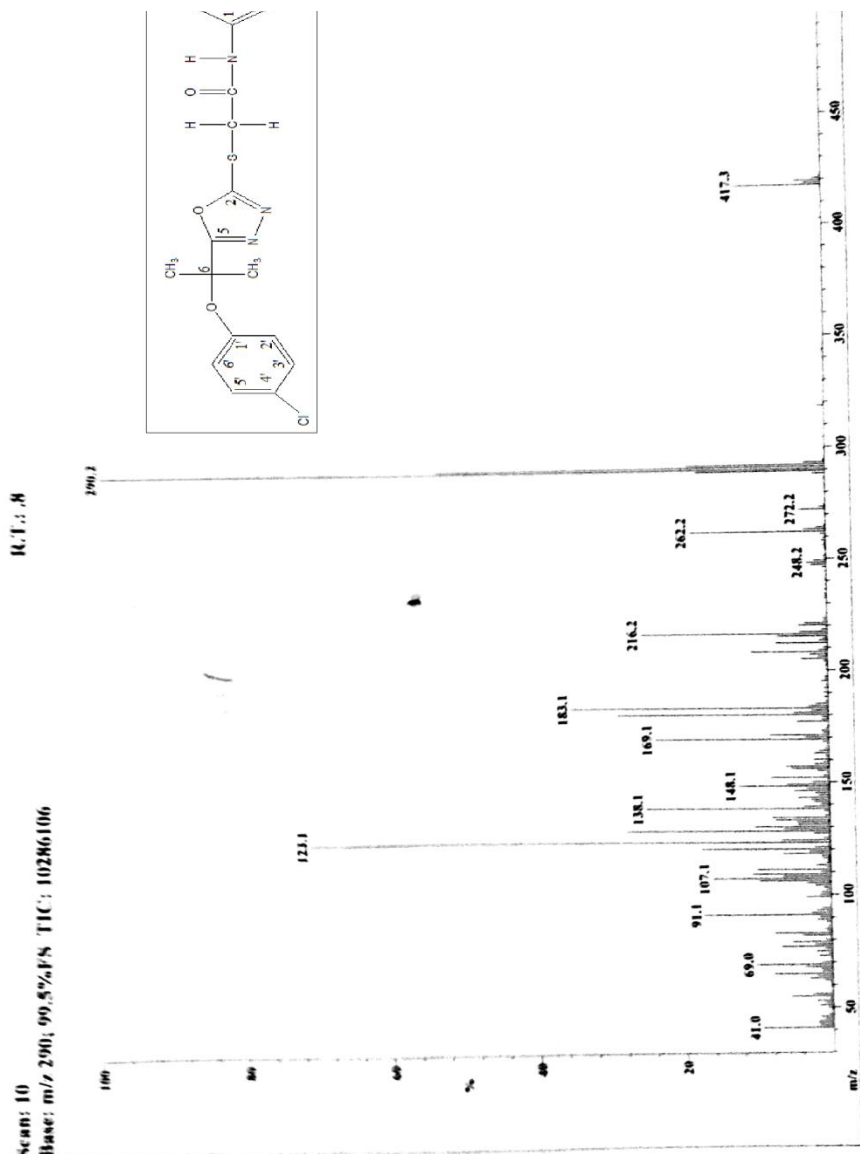

Figure-S9-: EI-MS of compound 3c

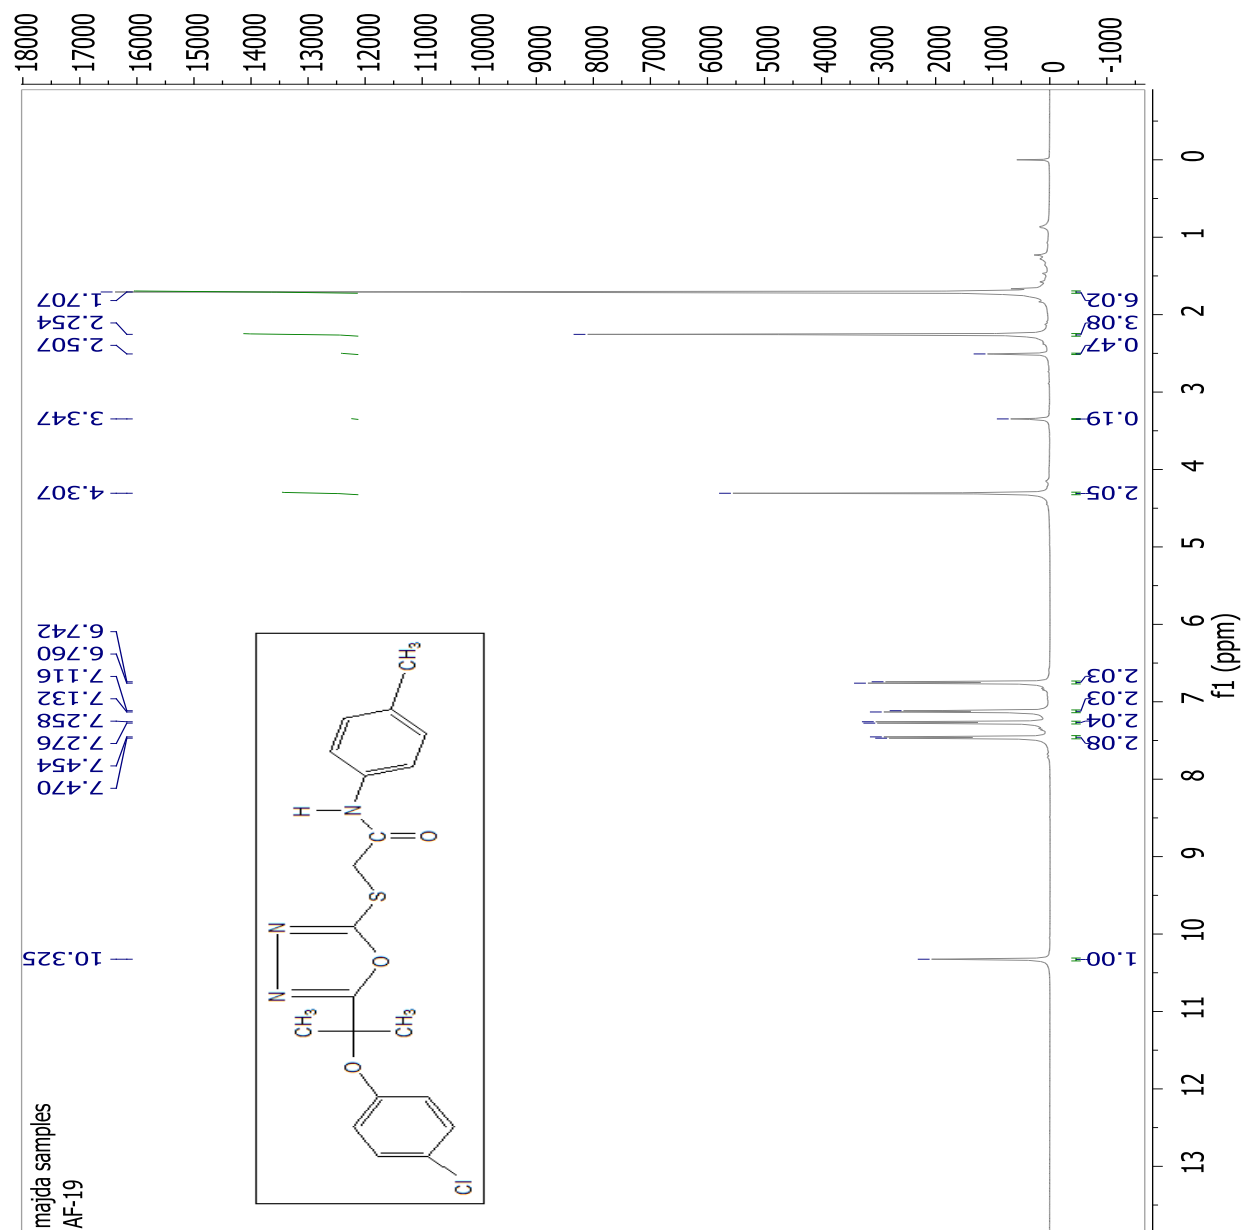

Figure-S10: <sup>1</sup>H-NMR spectrum of compound 3d

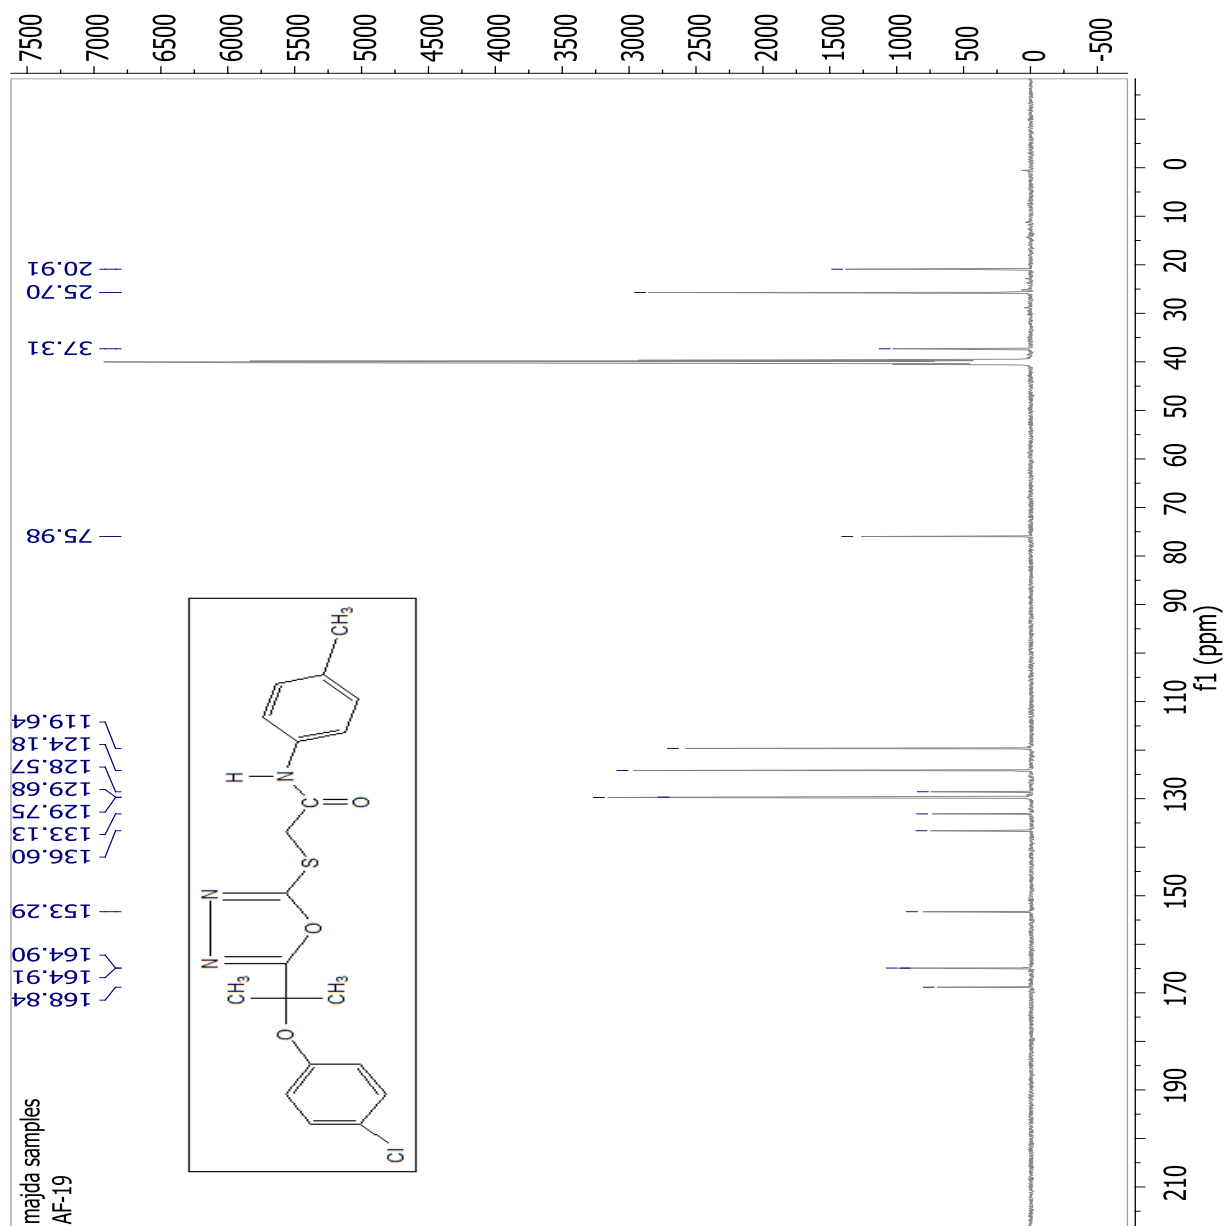

Figure-S11:  $^{13}\text{C}$ -NMR spectrums of compound 3d

File: 10P  
Date Run: 06-19-2017 (Time Run: 13:58:24)  
Sample: MAJIDA BATOOL/INST. OF CHEM/UNIOF PUNJAB LAHORE  
Instrument: JEOL 600 MSRoute  
Inlet: Direct Probe  
Ionization mode: EI+

R.T.: .98

Scan: 12  
Base: m/z 290; 99.5%FS TIC: 6957470

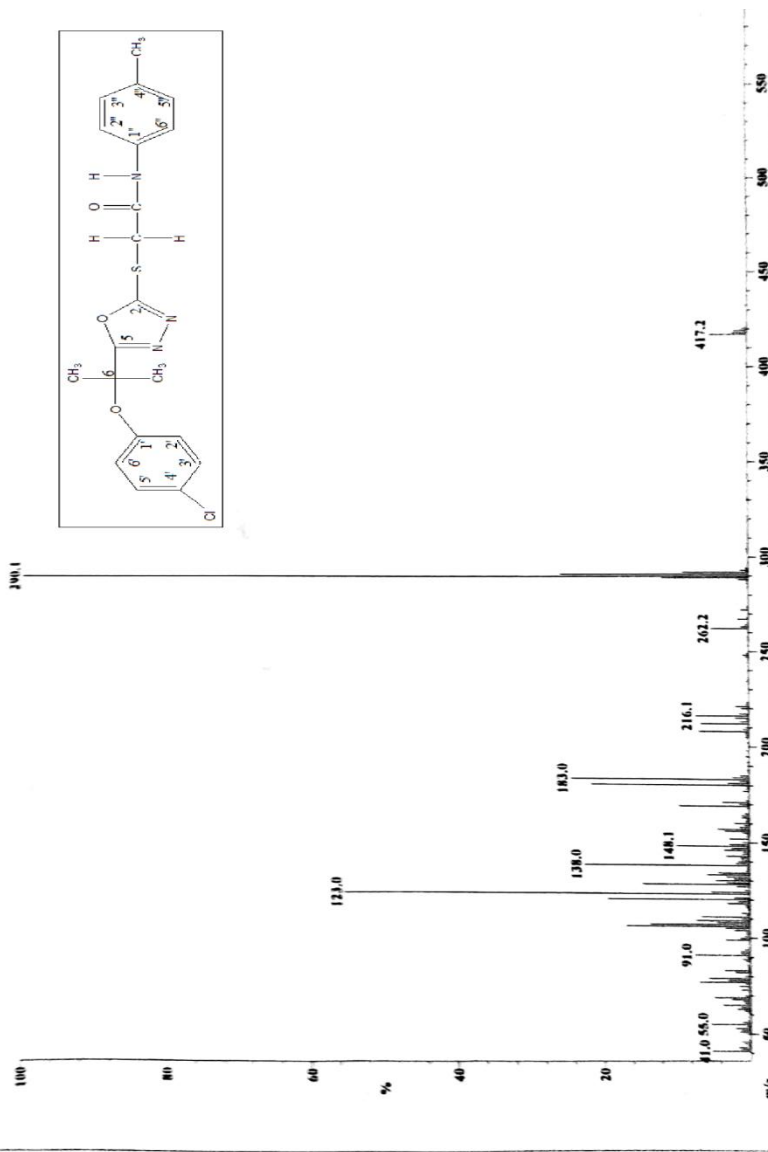

Figure-S12-: EI-MS of compound 3d

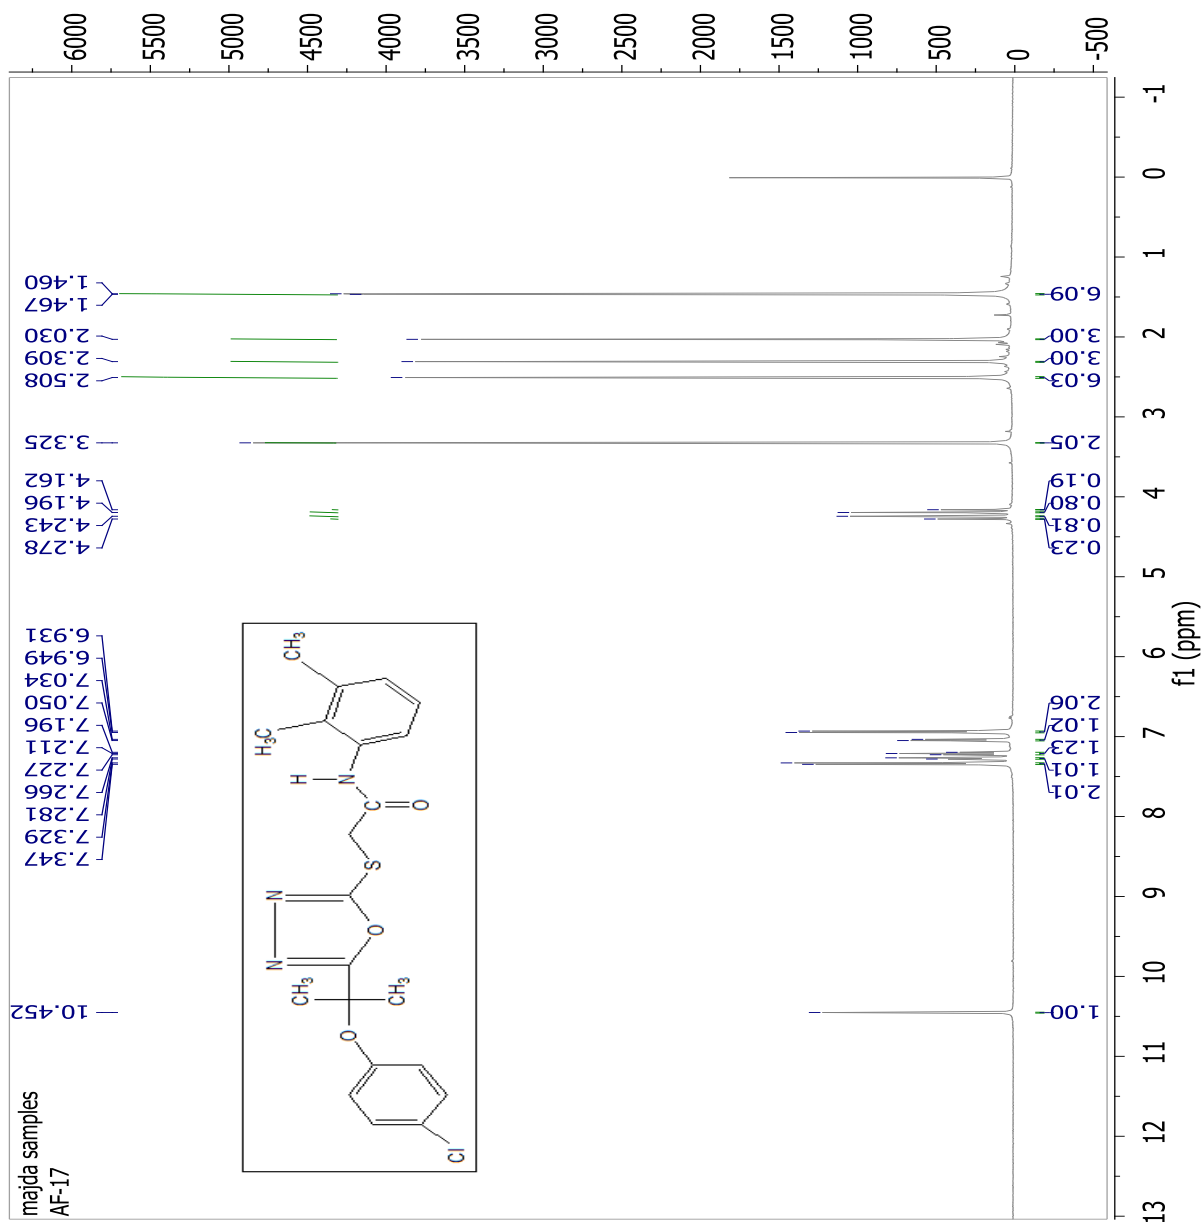

Figure-S13: <sup>1</sup>H-NMR spectrum of compound 3e



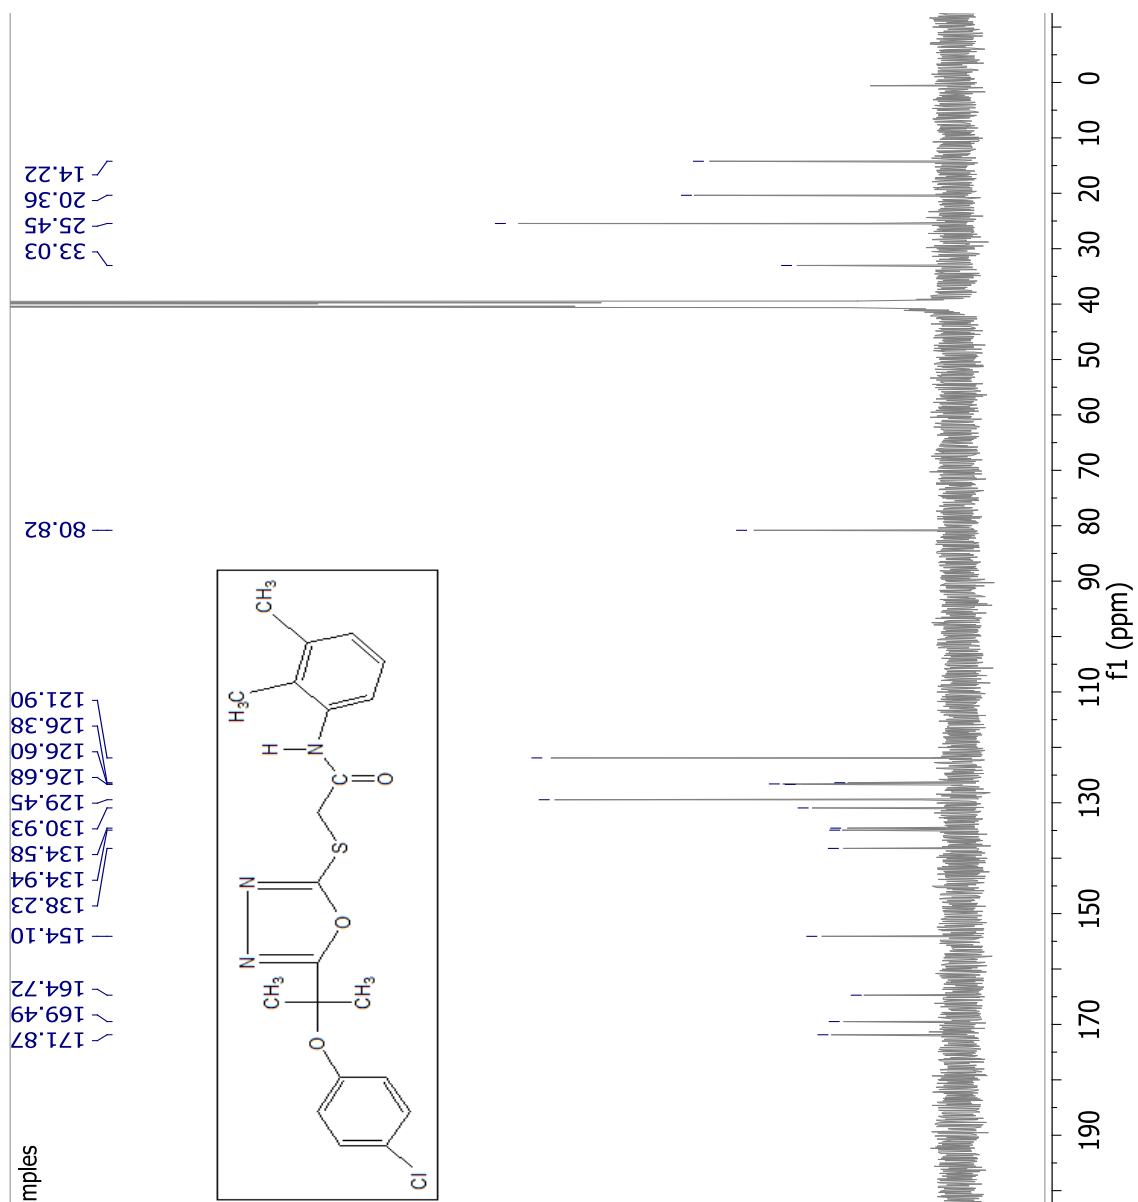

Figure-S14:  $^{13}\text{C}$ -NMR spectrum of compound 3e

Mass Lab (104)

6/20/2017 9:21:56 AM

File: 2P  
Sample: MAJDA BATOOL/INST. OF CHEM /UNIOF PUNJAB LAHORE  
Instrument: JEOL 600 MSRoute  
Inlet: Direct Probe  
Date Run: 06-20-2017 (Time Run: 09:13:10)  
Ionization mode: EI+

n: 9  
e: m/z 304; 99.5%FS TIC: 10912760

R.T.: .72

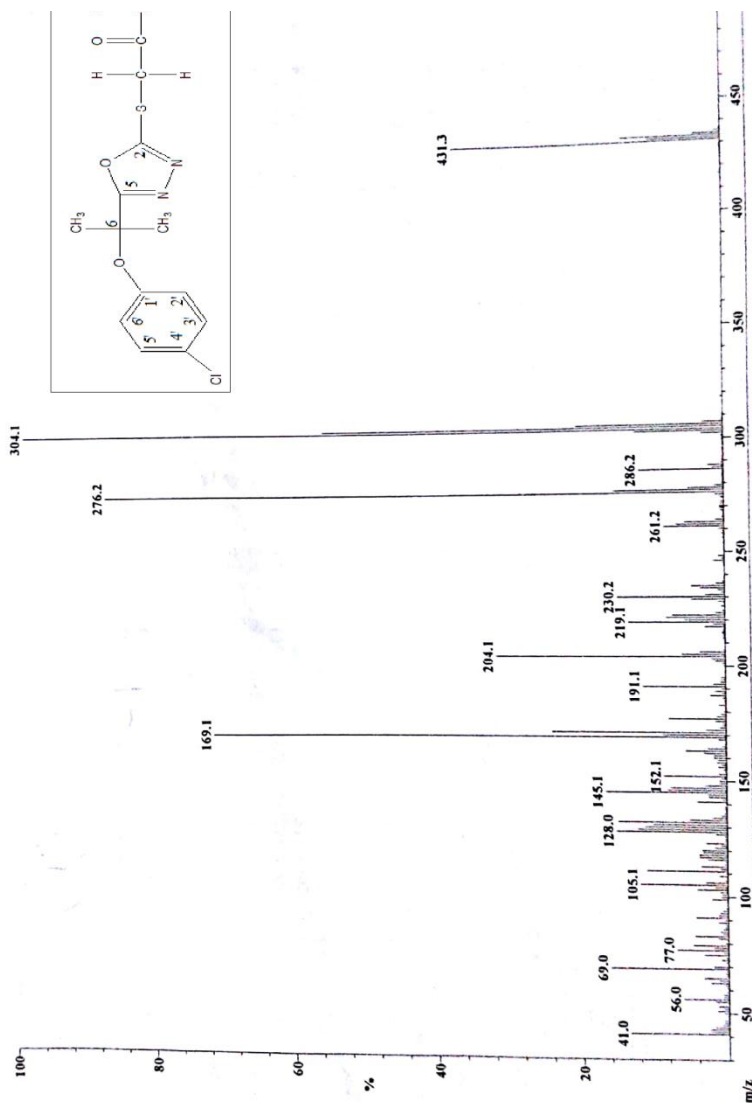

Figure-S15-: EI-MS of compound 3e

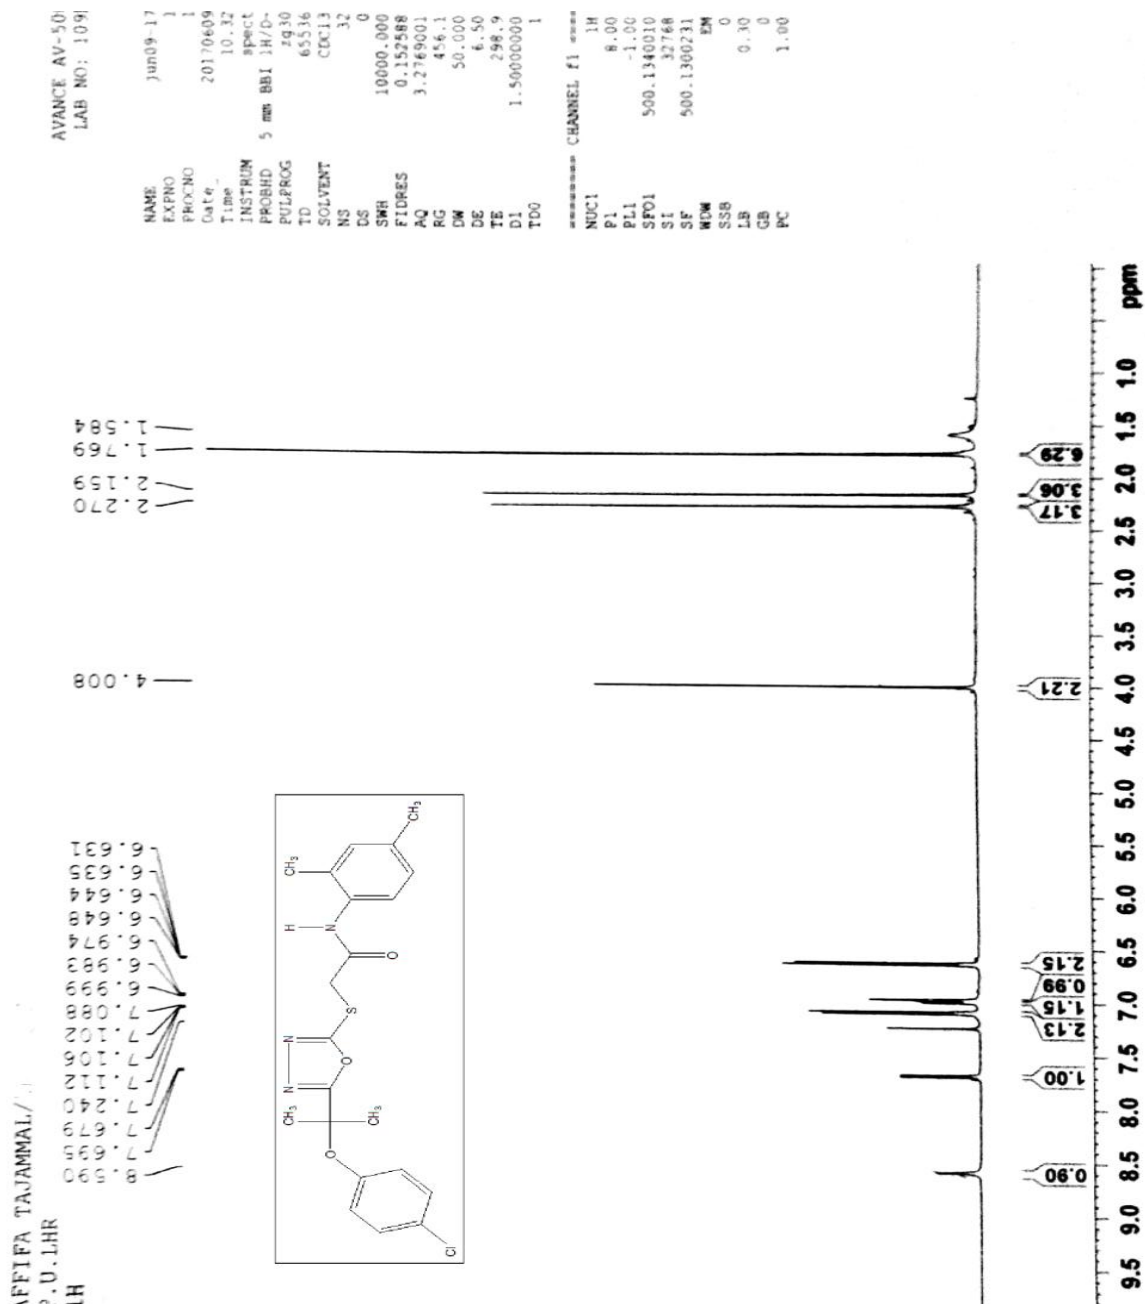

Figure-S16: <sup>1</sup>H-NMR spectrum of compound 3f

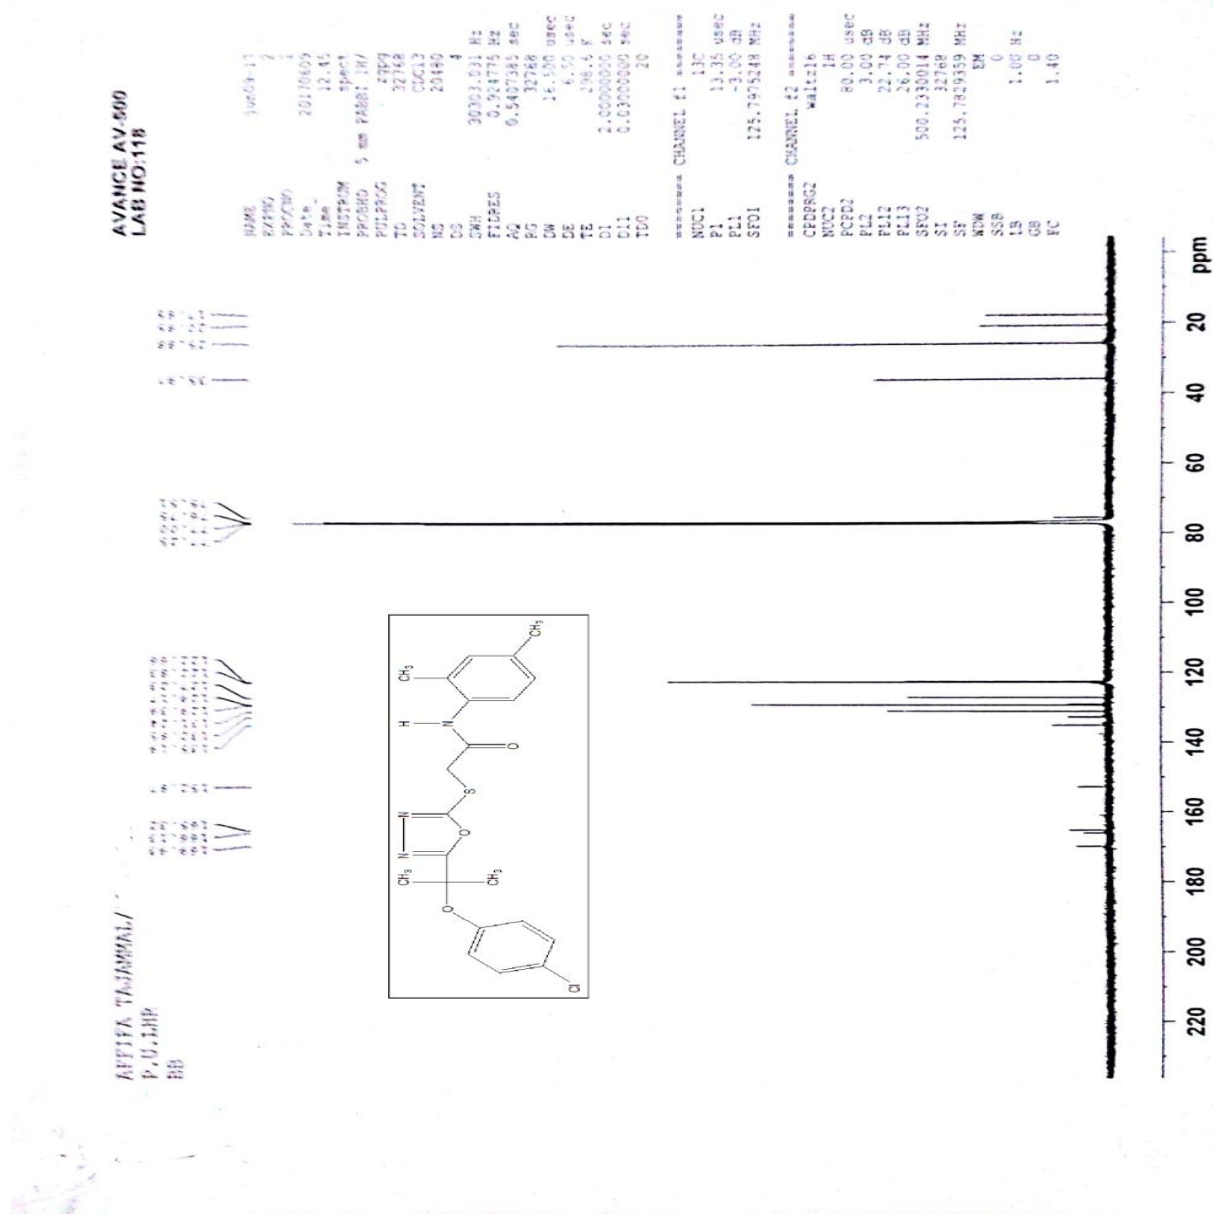

Figure-S17: <sup>13</sup>C-NMR spectrum of compound 3f

File: 1P  
 Date Run: 06-19-2017 (Time Run: 13:36:16)  
 Sample: MAJDA BATOOL/INST. OF CHEM /UNIOF PUNJAB LAHORE  
 Instrument: JEOL 600 MSRoute  
 Inlet: Direct Probe  
 Ionization mode: EI+

R.T.: .62

an: 8  
 se: m/z 304; 99.5%FS TIC: 12237032

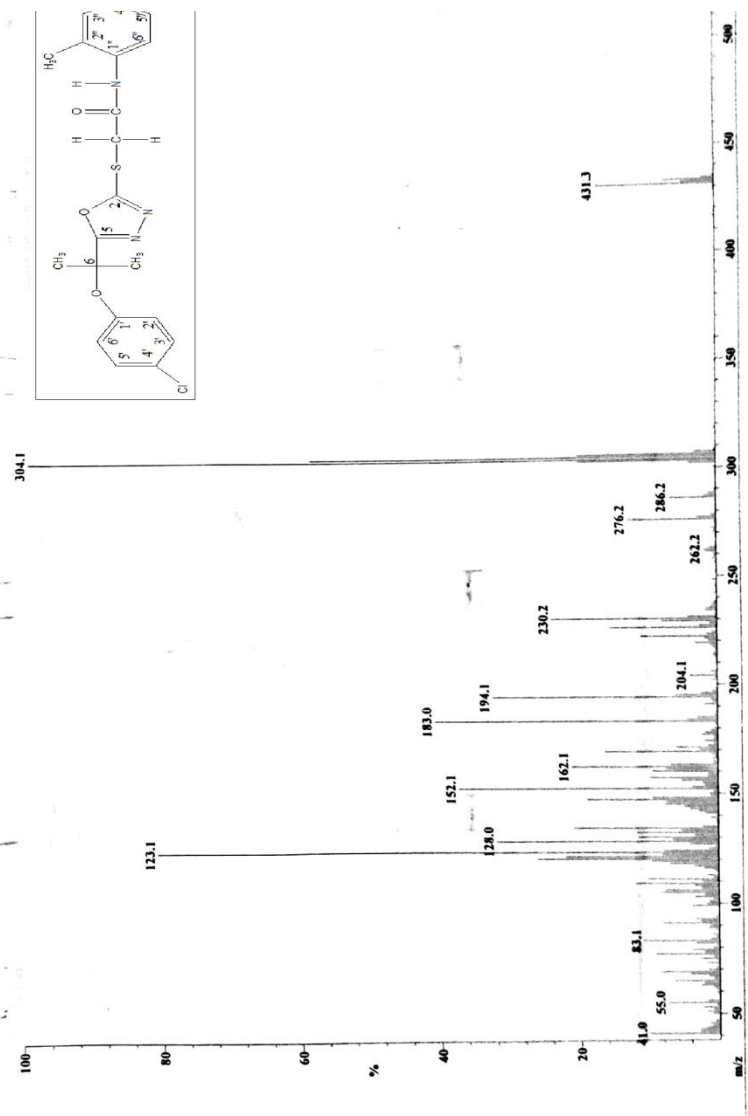

Figure-S18-: EI-MS of compound 3f

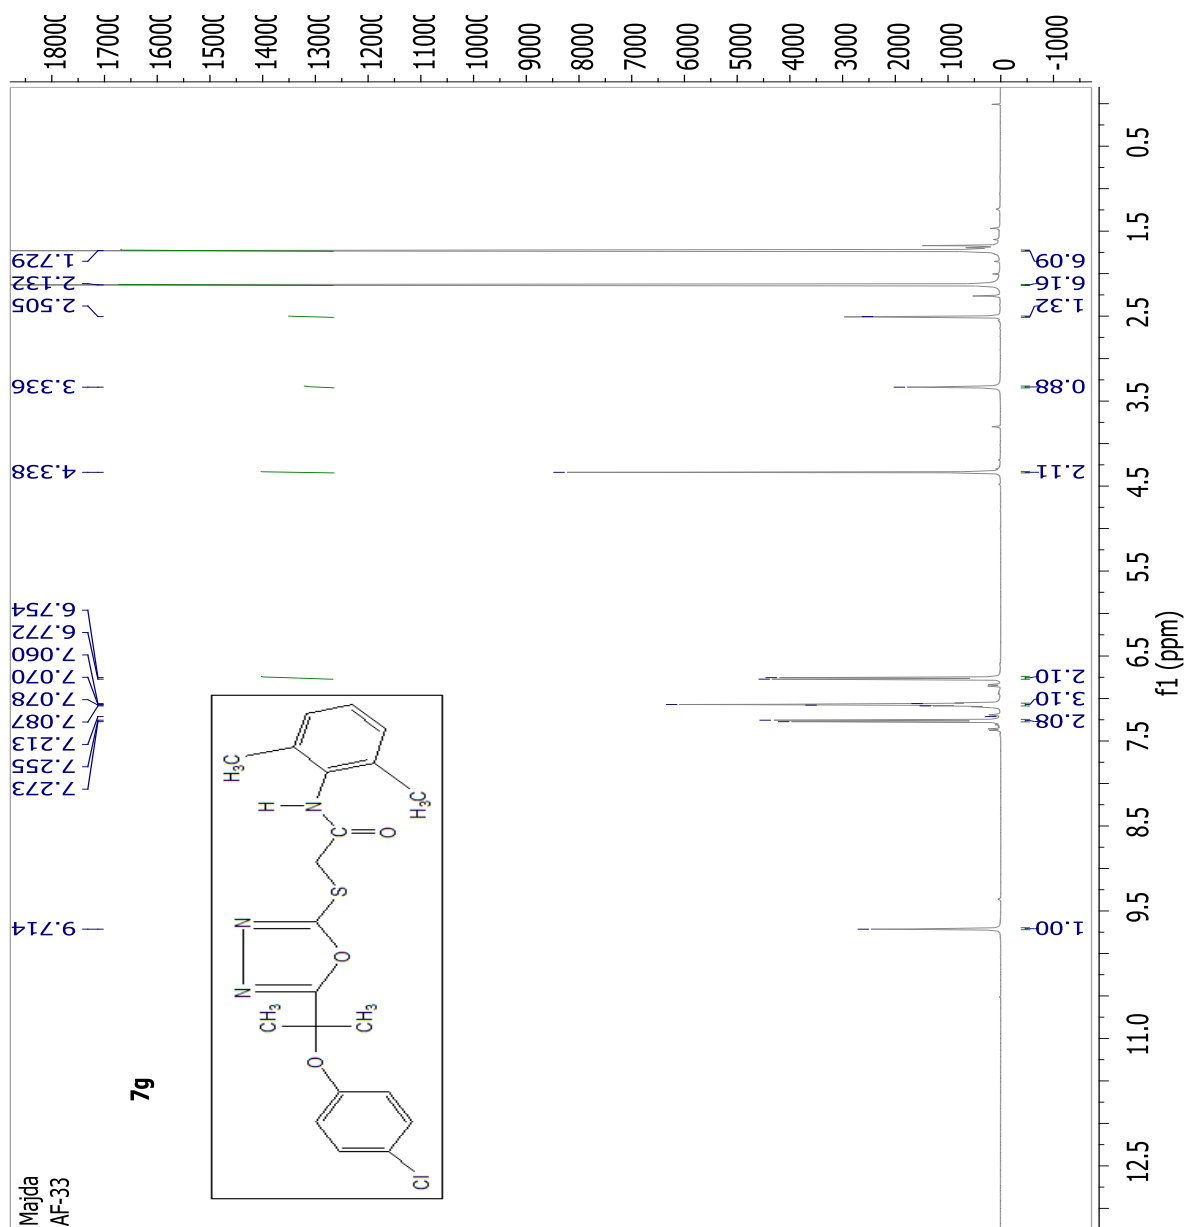

Figure-S19: <sup>1</sup>H-NMR spectrum of compound 3g

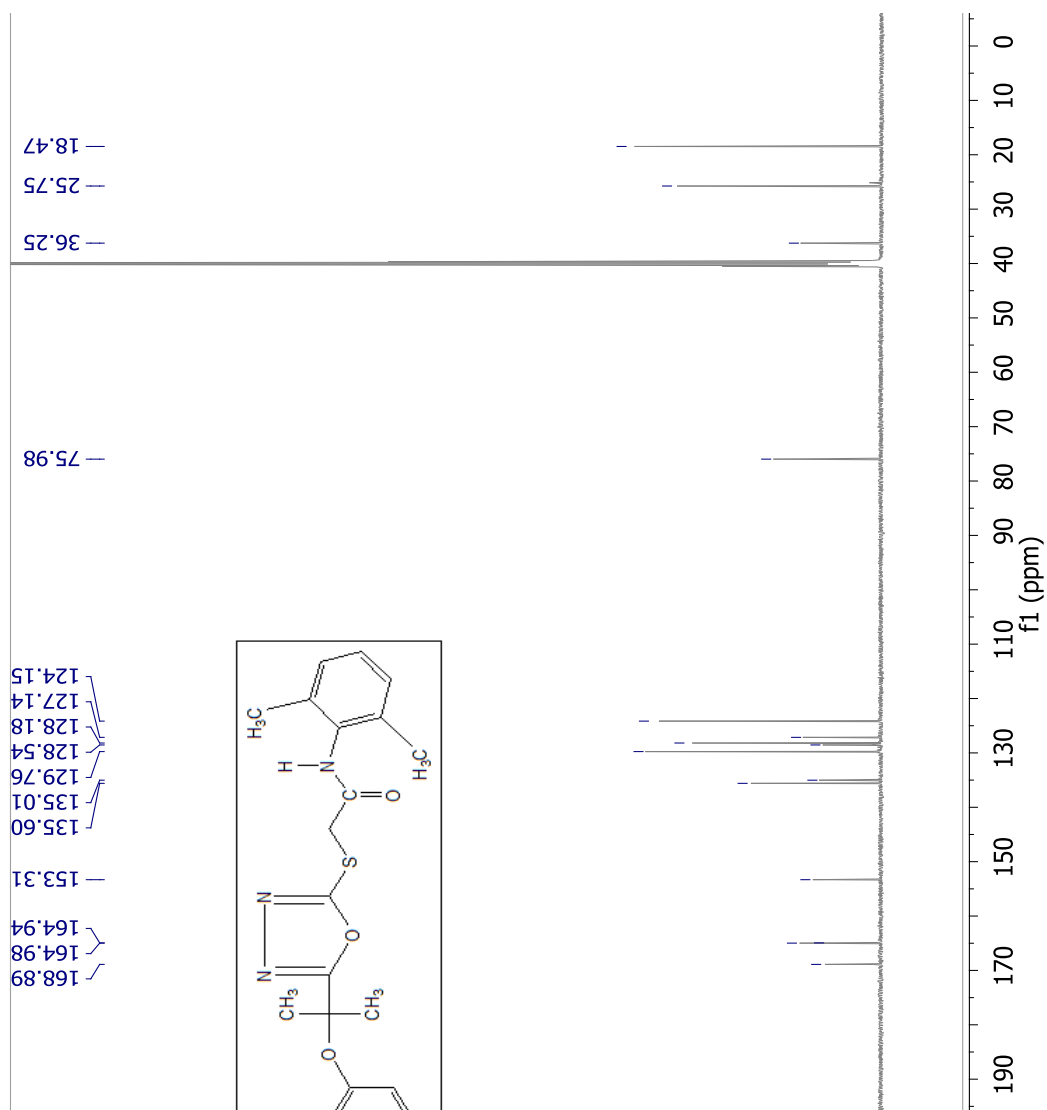

Figure-S23:  $^{13}\text{C}$ -NMR spectrum of compound 3g

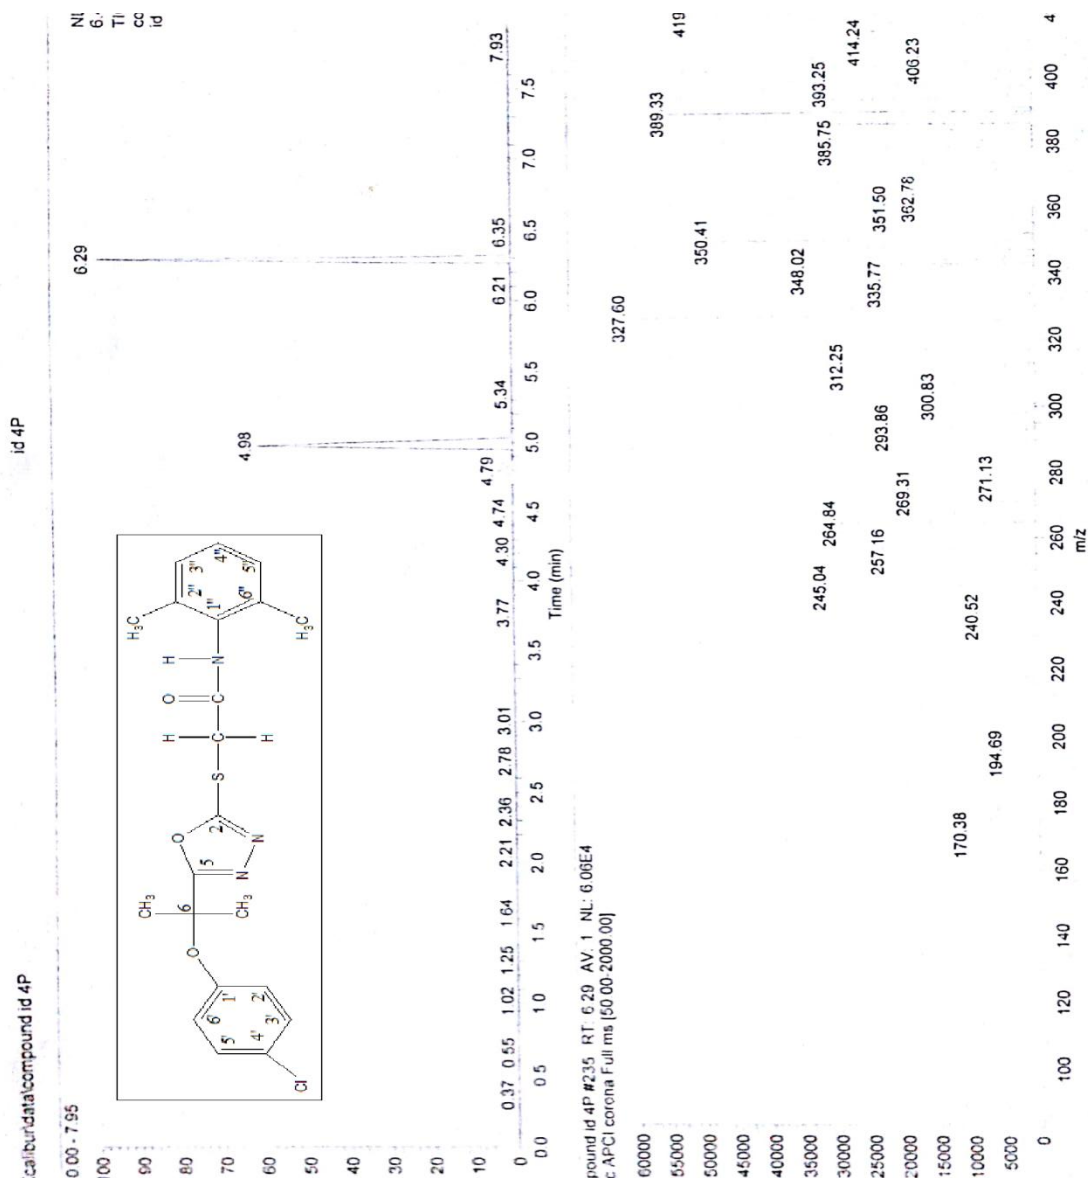

Figure-S21-: EI-MS of compound 3g



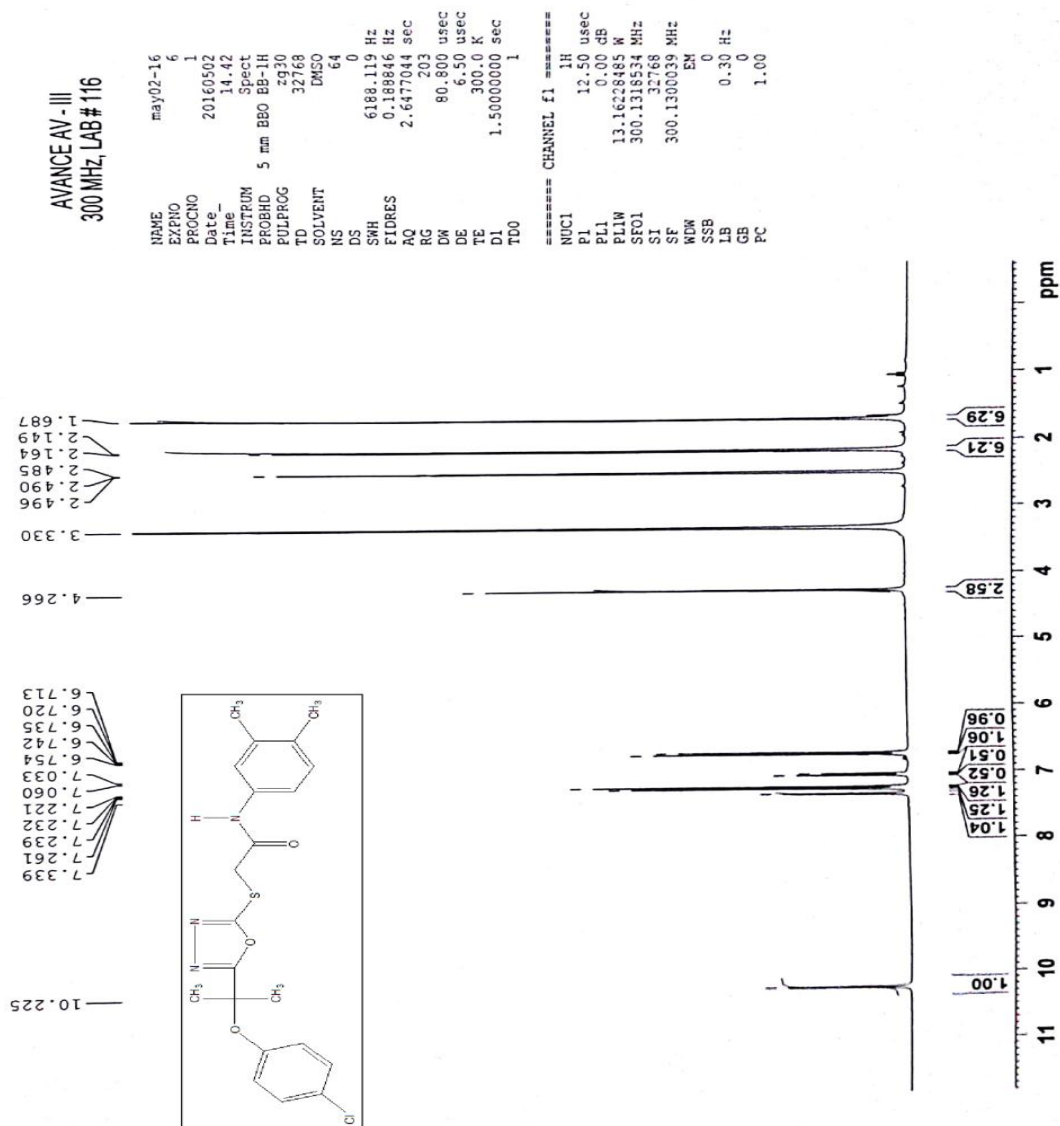

Figure-S22:  $^1\text{H}$ -NMR spectrum of compound 3h

AVANCE AV - III  
300 MHz, LAB # 116

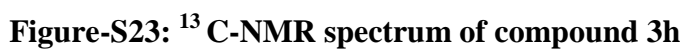

File: SP  
Date Run: 06-20-2017 (Time Run: 10:02:00)  
Sample: MAJDA BATOOL/INST. OF CHEM /UNI.OF PUNJAB LAHORE  
Instrument: JEOL 600 MSRoute  
Inlet: Direct Probe  
Ionization mode: EI+

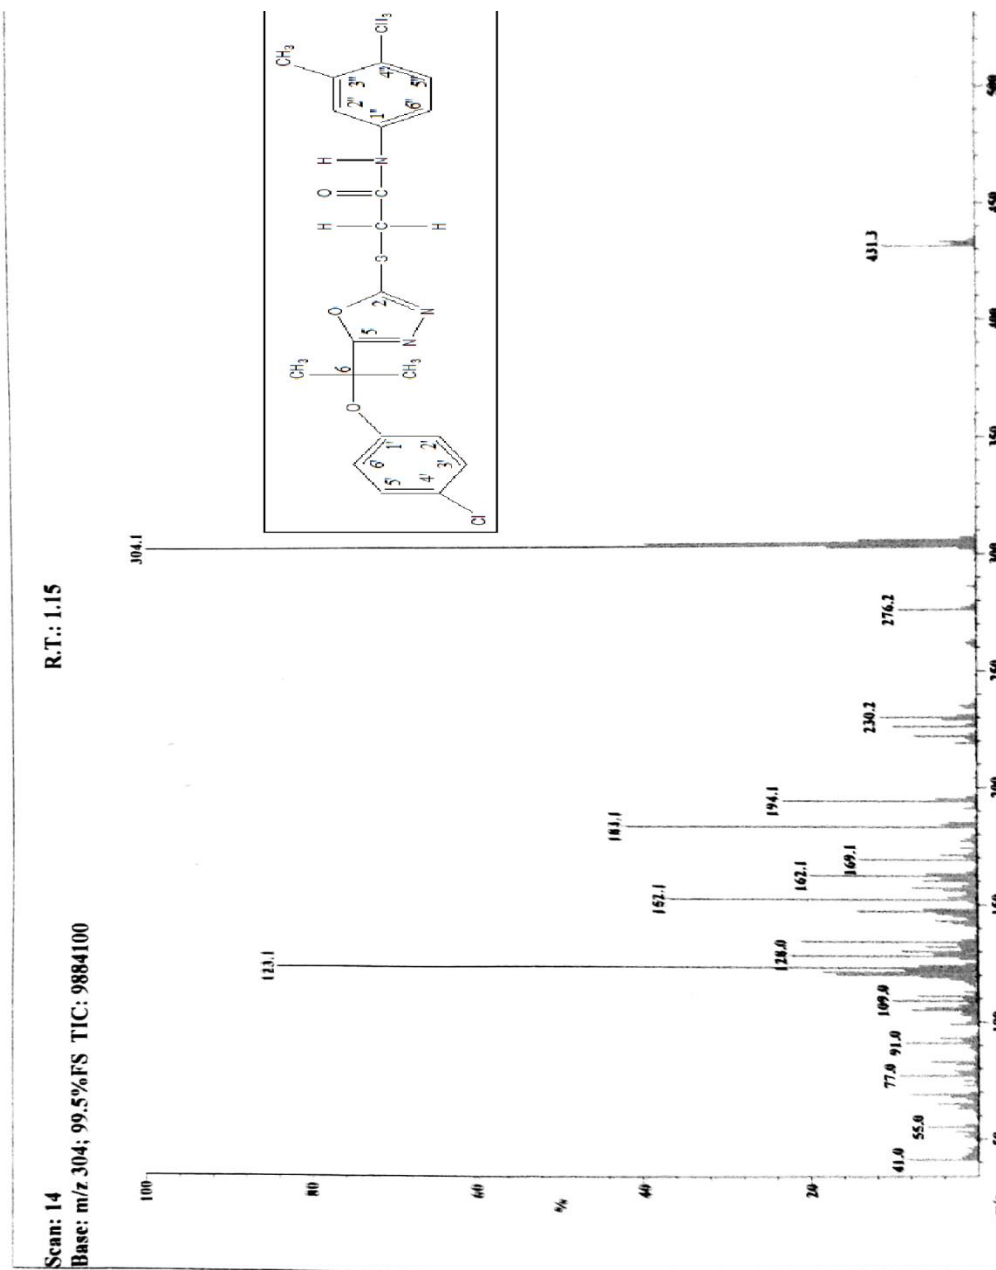

Figure-S24-: EI-MS of compound 3h

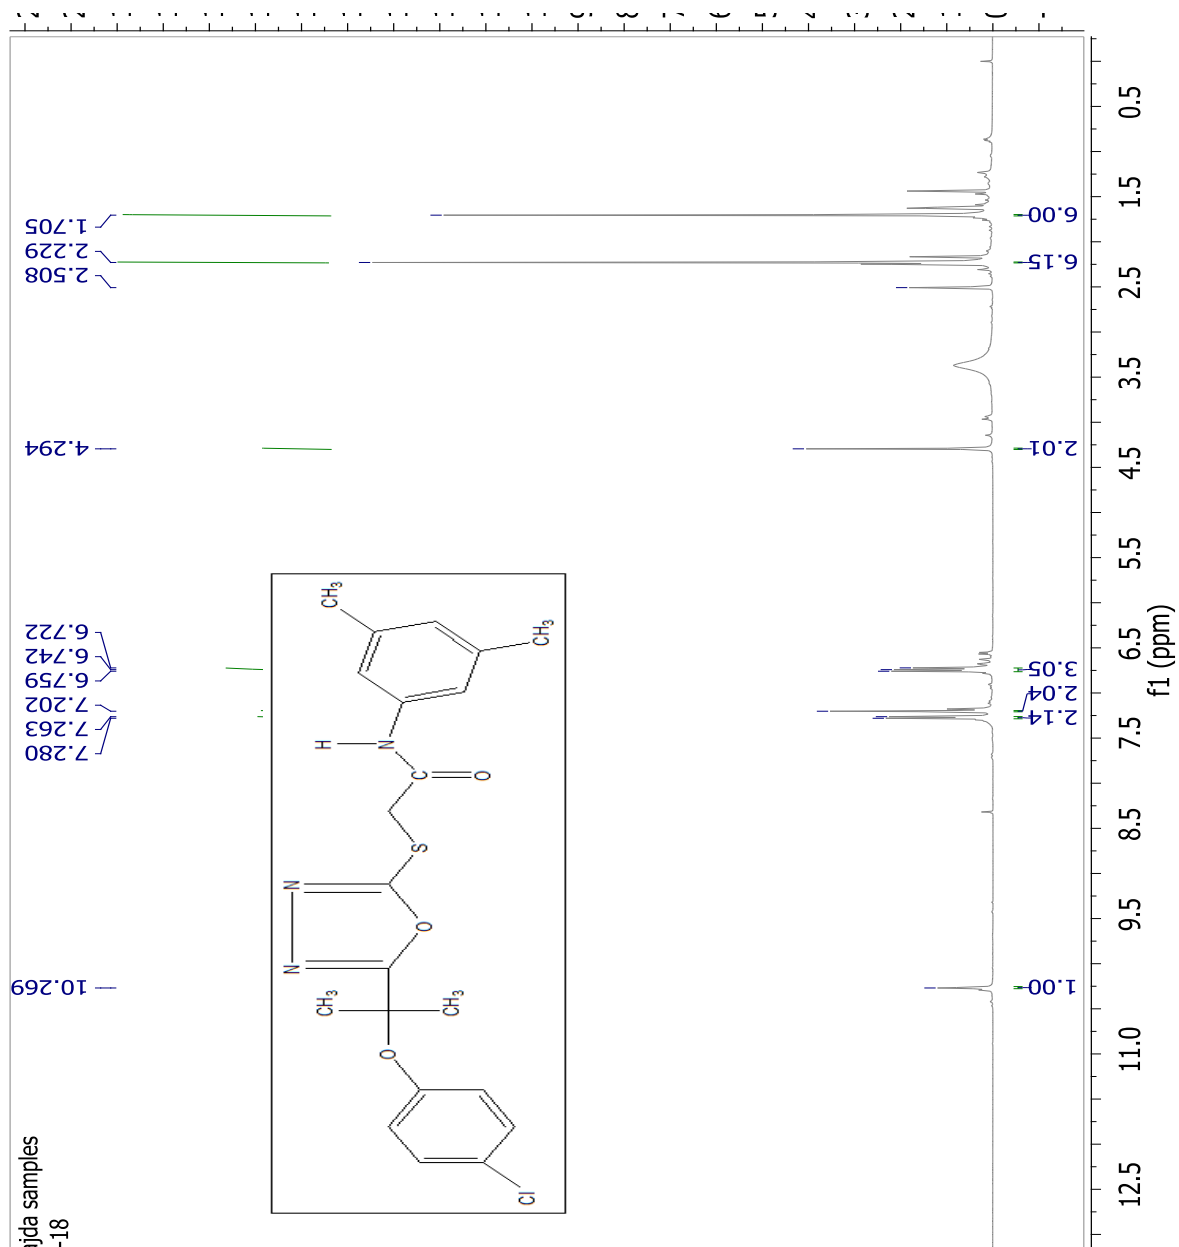

Figure-S25: <sup>1</sup>H-NMR spectrum of compound 3i

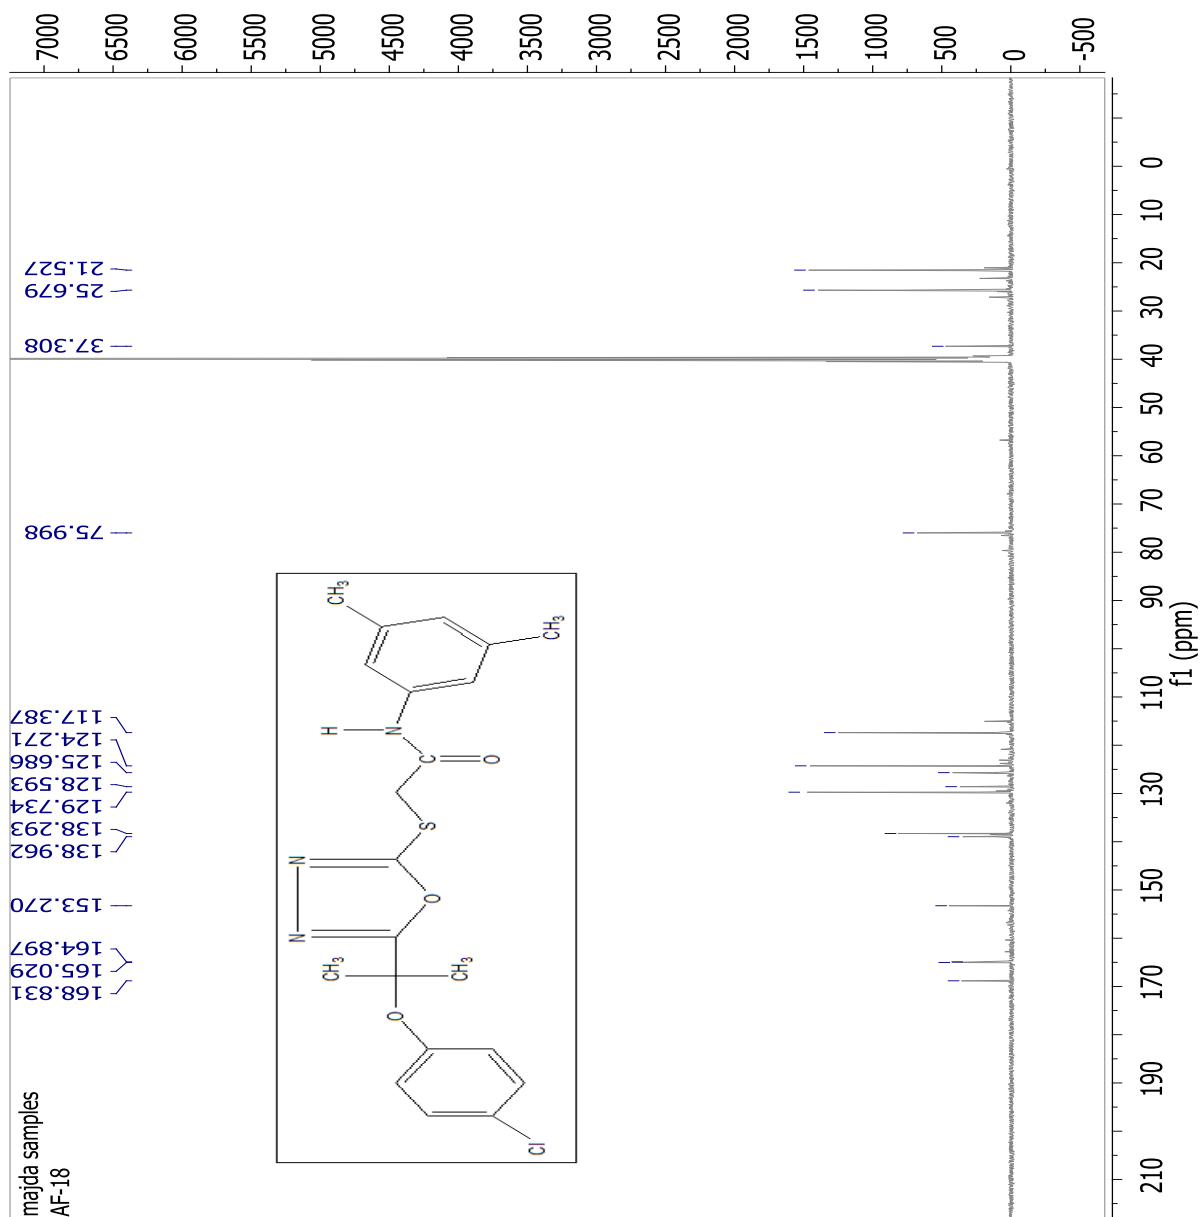

Figure-S26: <sup>13</sup>C-NMR spectrum of compound 3i

File: 6P  
 Date Run: 06-20-2017 (Time Run: 10:36:17)  
 Sample: MAJDA BATOOL/INST. OF CHEM/UNIOF PUNJAB LAHORE  
 Instrument: JEOL 600 MSRoute  
 Inlet: Direct Probe  
 Ionization mode: EI+

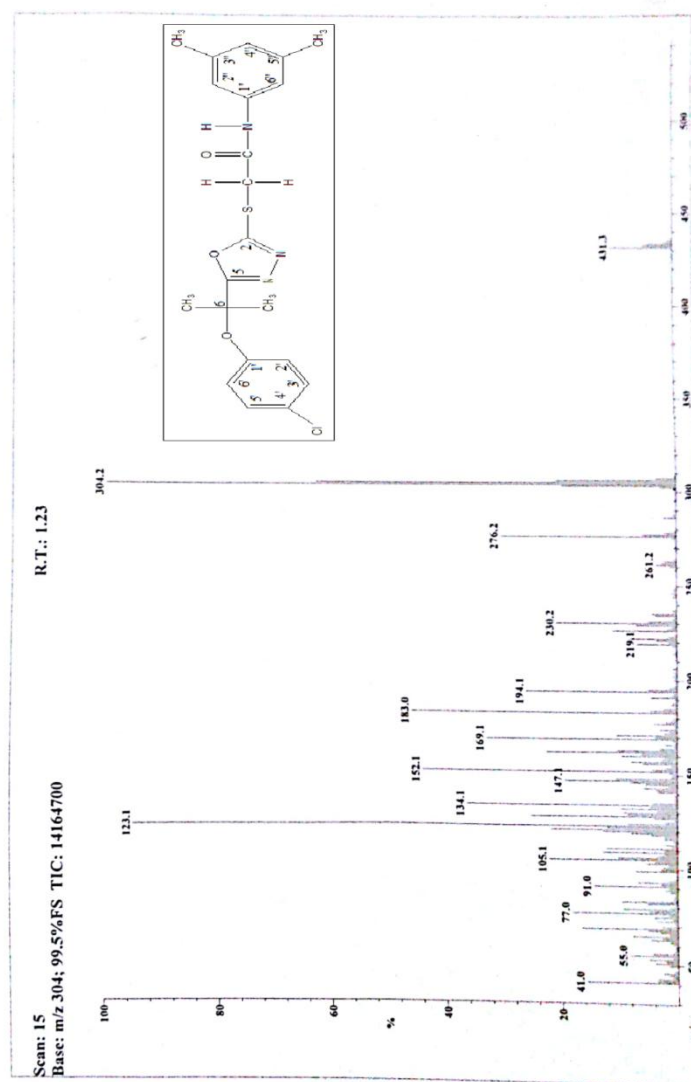

Figure-S27-: EI-MS of compound 3i
